# Supplementary material
Source: Springer Nature journal article supplement (https://www.springermedizin.de/resource/supplementary/12990_2009_248_MOESM6_ESM.pdf/9612880)

**A**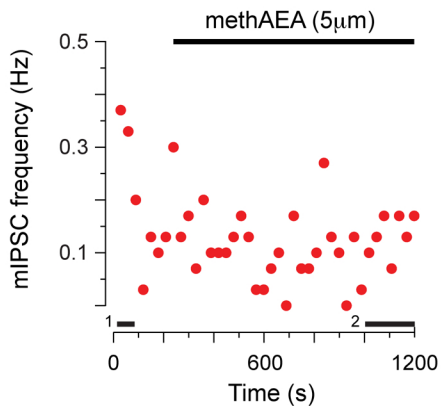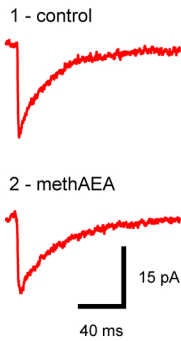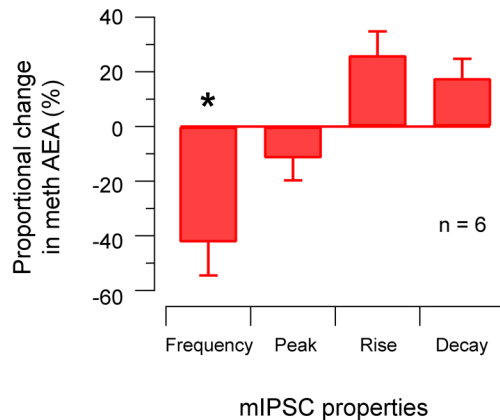**B**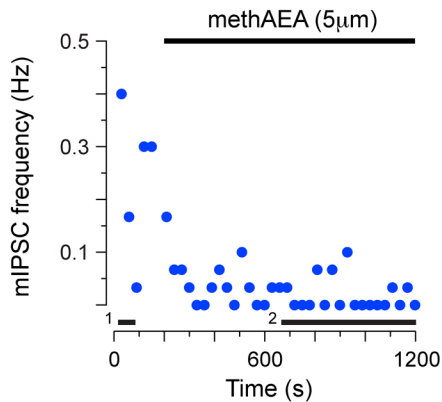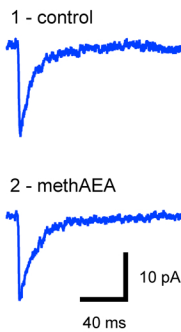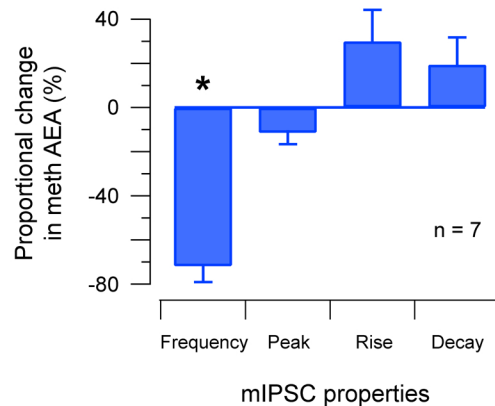

Supplement: MOESM6 [file 9612880]
